# Supplementary material
Source: PubMed Central journal article supplement (PMC4959867)
Supplement: 10.1194_M068981_jlr.M068981-1.pdf [file 10.1194_M068981_jlr.M068981-1.pdf]

Supplementary Data to  
**Two novel allene oxides and syntheses of human and plant pathogenic fungi, *Coccidioides immitis* and *Zyoseptoria tritici***  
 Ernst H Oliw, Marc Aragó, Yang Chen, and Fredrik Jernerén

**Oxidation of arachidonic acid by 8*R*-DOX-AOS (EAS28473) of *C. immitis***

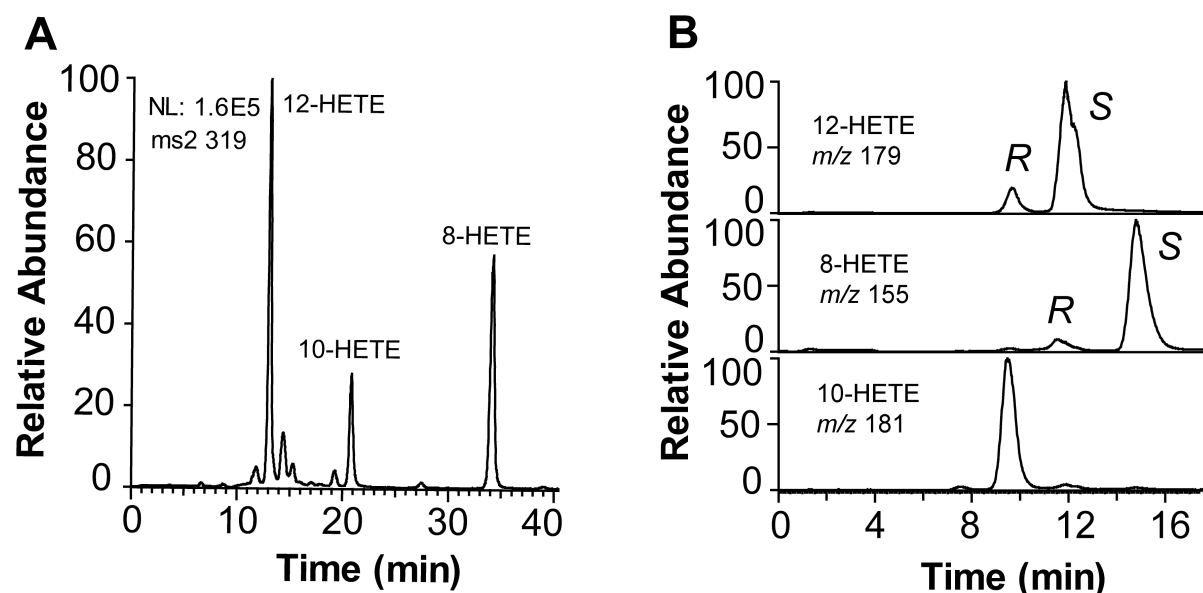

**Fig. S1.** LC-MS analysis of the oxidation of 20:4*n*-6 to HPETE by 8*R*-DOX-AOS (EAS28473). A. NP-HPLC-MS/MS analysis of HETE after reduction of HPETE to HETE with TPP. The MS/MS spectra of 8-, 10- and 12-HETE were as reported (1). B. CP-HPLC-MS/MS analysis of HETE. The elution order of the *R* and *S* stereoisomer of 8- and 12-HETE is marked (column: Reprisil Chiral-AM)(cf. Ref. (2)). NL, intensity normalized to 100%.

**Catalytic properties of recombinant 9*R*-DOX-AOS (EGP87976) of *Z. tritici***

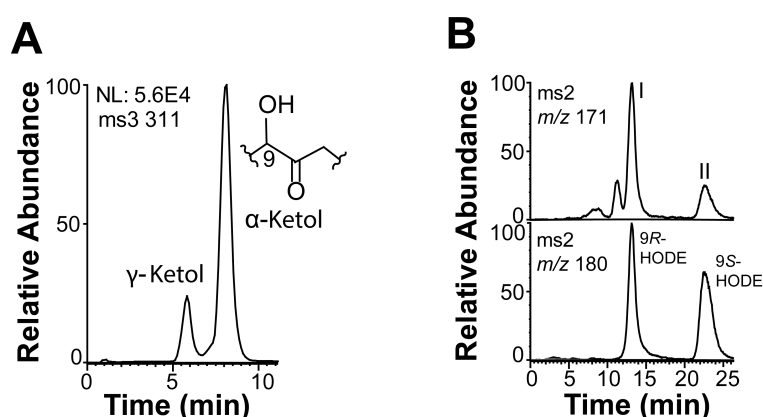

**Fig. S2.** LC-MS analysis of products formed from 9*R*-HPODE and 18:2*n*-6 by 9*R*-DOX-AOS (EGP87976). A. RP-HPLC-MS/MS analysis of polar products ( $\gamma$ -ketol;  $\alpha$ -ketol) formed from 9*R*-HPODE by recombinant 9*R*-DOX-AOS (EGP87976). B. Steric analysis of 9-HPODE formed from 18:2*n*-6 by CP-HPLC-MS/MS analysis after reduction to an alcohol (Reprisil Chiral-AM). Top chromatogram shows analysis of 9-HODE ( $m/z$  171) and the bottom chromatogram analysis of added rac [ $^{13}\text{C}_{18}$ ]9-HODE ( $m/z$  180). Part of 9*R*-HPODE was transformed by the AOS activity, but it remained the main stereoisomer.

## Transformation of hydroperoxides by 8*R*- and 8*S*-DOX-AOS

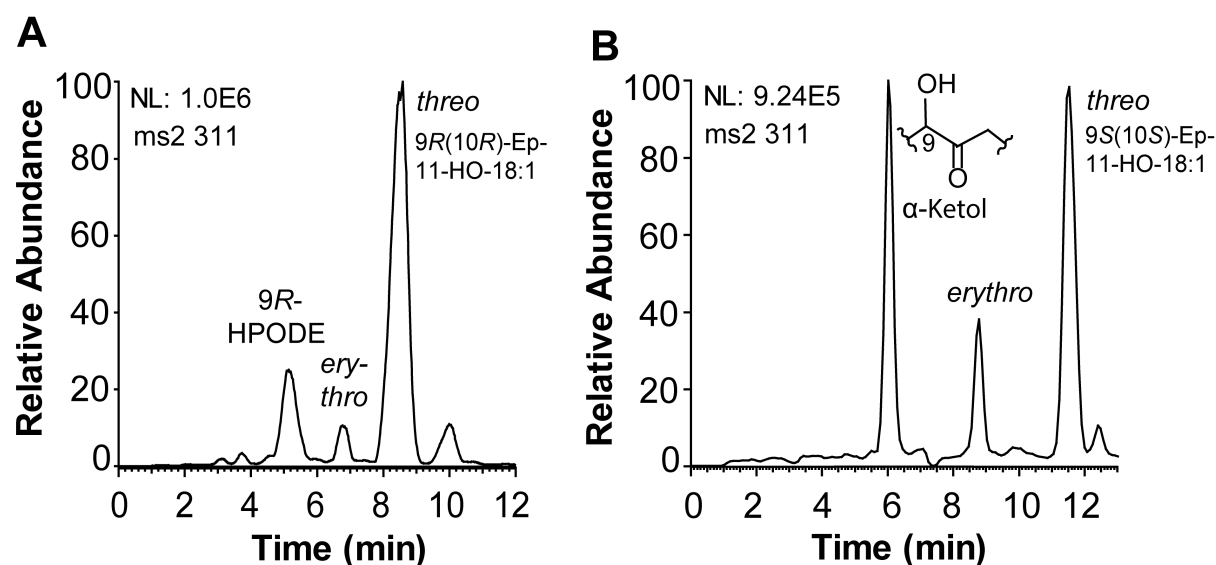

**Fig. S3.** NP-HPLC-MS/MS analysis of the products formed by transformation of 9*R*- and 9*S*-HPODE by recombinant 8*R*- and 8*S*-DOX-AOS. A. Products formed from 9*R*-HPODE by 8*R*-DOX-AOS (EAS28473) consisted mainly of *threo* 9*R*(10*R*)-epoxy-11-hydroxy-12*Z*-octadecenoic acid. B. 9*S*-HPODE was transformed by 8*S*-DOX-AOS (EGP83657) to an  $\alpha$ -ketol and to epoxy alcohols (*erythro* and *threo* 9*S*(10*S*)-epoxy-11-hydroxy-12*Z*-octadecenoic acids (cf. Ref. (3)).

## References

1. Bylund, J., Ericsson, J., and Oliw, E. H. (1998) Analysis of cytochrome P450 metabolites of arachidonic and linoleic acids by liquid chromatography-mass spectrometry with ion trap MS. *Anal. Biochem.* **265**, 55-68
2. Schneider, C., Yu, Z., Boeglin, W. E., Zheng, Y., and Brash, A. R. (2007) Enantiomeric separation of hydroxy and hydroperoxy eicosanoids by chiral column chromatography. *Methods Enzymol.* **433**, 145-157
3. Oliw, E. H., Garscha, U., Nilsson, T., and Cristea, M. (2006) Payne rearrangement during analysis of epoxyalcohols of linoleic and alpha-linolenic acids by normal phase liquid chromatography with tandem mass spectrometry. *Anal. Biochem.* **354**, 111-126
